# Supplementary material for: OpenCyto: An Open Source Infrastructure for Scalable, Robust, Reproducible, and Automated, End-to-End Flow Cytometry Data Analysis
Source: PLoS Comput Biol. 2014 Aug 28;10(8):e1003806. doi: 10.1371/journal.pcbi.1003806 (PMC4148203; doi:10.1371/journal.pcbi.1003806)
Supplement: File S1 — OpenCyto gating template for the HVTN 080 study. Each row contains a cell population definition. Columns are provided for the population name (alias, pop), channels defining the population (dims), its relationship to other populations (parent), and the gating algorithm (gating_method) to be used to gate the population. Additional columns for each population are provided for algorithm-specific parameters (gating_args), and well as the ability to group (collapseDataForGating, groupBy) samples for gating and preprocessing based on sample-level metadata in the “phenoData” slot of the GatingSet object. (XLSX) [file pcbi.1003806.s010.xlsx]

## Sheet: SupplementaryFile1.csv
alias	pop	parent	dims	gating_method	gating_args	collapseDataForGating	groupBy	preprocessing_method	preprocessing_args
boundary	boundary	root	FSC-A,SSC-A	boundary	max=c(2.5e5,2.5e5)
singlet	singlet	boundary	FSC-A,FSC-H	singletGate	prediction_level=0.999,wider_gate=TRUE,subsample_pct=0.2
viable	viable-	singlet	AViD	mindensity	gate_range=c(500,1000)
nonNeutro	nonNeutro-	viable	SSC-A	mindensity	gate_range=c(5e4,1.5e5)
DebrisGate	DebrisGate+	nonNeutro	FSC-A	mindensity	gate_range=c(0,1e+05)
nonDebris	nonDebris+	viable	FSC-A	refGate	DebrisGate
lymph	lymph	nonDebris	FSC-A,SSC-A	flowClust	K=2,quantile=0.99			prior_flowClust	K=2
cd3	cd3+	lymph	cd3	mindensity
*	cd8+/-	cd3	cd8	mindensity	gate_range=c(1500,2800),min=0
cd4pos	cd4+	cd8-	cd4	mindensity	gate_range=c(1000,1500),min=0
cd4neg	cd4-	cd8+	cd4	cytokine	adjust=2,tol=1e-1
cd4	cd4+cd8-	cd3	cd4,cd8	refGate	cd4pos:cd8-
cd8	cd4-cd8+	cd3	cd4,cd8	refGate	cd4neg:cd8+
TNFa	TNFa+	cd4	TNFa	cytokine	adjust=2,tol=1e-4	TRUE	PTID:VISITNO
TNFa	TNFa+	cd8	TNFa	cytokine	adjust=2,tol=1e-4	TRUE	PTID:VISITNO
IFNg	IFNg+	cd4	IFNg	cytokine	adjust=2,tol=1e-4	TRUE	PTID:VISITNO
IFNg	IFNg+	cd8	IFNg	cytokine	adjust=2,tol=1e-4	TRUE	PTID:VISITNO
IL2	IL2+	cd4	IL2	cytokine	adjust=2,tol=1e-3	TRUE	PTID:VISITNO
IL2	IL2+	cd8	IL2	cytokine	adjust=2,tol=1e-3	TRUE	PTID:VISITNO
*	cd57+/-	cd4	cd57	mindensity	gate_range=c(1000,3000),min=0	TRUE	PTID:VISITNO
*	cd57+/-	cd8	cd57	mindensity	gate_range=c(1000,3000),min=0	TRUE	PTID:VISITNO
prf_gate	Perforin+	cd4/cd57-	Perforin	cytokine	adjust=2,tol=1e-2	TRUE	PTID:VISITNO
prf_gate	Perforin+	cd8/cd57-	Perforin	cytokine	adjust=2,tol=1e-2	TRUE	PTID:VISITNO
Prf	Perforin+	cd4	Perforin	refGate	cd4/cd57-/prf_gate
Prf	Perforin+	cd8	Perforin	refGate	cd8/cd57-/prf_gate
gzb_gate	Granzyme+	cd4/cd57-	Granzyme	cytokine	adjust=2,tol=1	TRUE	PTID:VISITNO
gzb_gate	Granzyme+	cd8/cd57-	Granzyme	cytokine	adjust=2,tol=1	TRUE	PTID:VISITNO
GzB	Granzyme+	cd4	Granzyme	refGate	cd4/cd57-/gzb_gate
GzB	Granzyme+	cd8	Granzyme	refGate	cd8/cd57-/gzb_gate
