# Supplementary material for: OpenCyto: An Open Source Infrastructure for Scalable, Robust, Reproducible, and Automated, End-to-End Flow Cytometry Data Analysis
Source: PLoS Comput Biol. 2014 Aug 28;10(8):e1003806. doi: 10.1371/journal.pcbi.1003806 (PMC4148203; doi:10.1371/journal.pcbi.1003806)
Supplement: File S2 — OpenCyto gating template for gating the negative control in the CyTOF data set. The T-cell maturational subsets are not defined in this template, nor are the Boolean combinations of cytokine producing cells; only the marginal cytokine subsets are defined here, and used as reference gates for the stimulated samples. (XLSX) [file pcbi.1003806.s011.xlsx]

## Sheet: SupplementaryFile2.csv
alias	pop	parent	dims	gating_method	gating_args	collapseDataForGating	groupBy	preprocessing_method	preprocessing_args
live	live	root	Cell_length,DNA1	flowClust	K=2,target=c(25,500)			prior_flowClust
lymph	DNA-	live	DNA1,DNA2	dnaGate
MuCD45-	MuCD45-	lymph	MuCD45	mindensity	positive=FALSE
Living	Live-	lymph	Live	mindensity	positive=FALSE, gate_range=c(1,2)
Via	MuCD45-Live-	lymph	MuCD45,Live	refGate	MuCD45-:Living
CD3+	CD3+	Via	CD3	mindensity
CD8+	CD8+	Via	CD8	mindensity
CD3+CD8+	CD3+CD8+	Via	CD3,CD8	refGate	CD3+:CD8+
TNFa	TNFa+	CD3+CD8+	TNFa	quantileGate	probs=0.99
IFNgamma	IFNgamma+	CD3+CD8+	IFNgamma	quantileGate	probs=0.99
MIP1a	MIP1a+	CD3+CD8+	MIP1a	quantileGate	probs=0.99
MIP1b	MIP1b+	CD3+CD8+	MIP1b	quantileGate	probs=0.99
IL2	IL2+	CD3+CD8+	IL2	quantileGate	probs=0.99
GMCSF	GMCSF+	CD3+CD8+	GMCSF	quantileGate	probs=0.99
CD107	CD107+	CD3+CD8+	CD107	quantileGate	probs=0.99
GzmB	GzmB+	CD3+CD8+	GzmB	quantileGate	probs=0.99
Perforin	Perforin+	CD3+CD8+	Perforin	quantileGate	probs=0.99
