# Supplementary material for: OpenCyto: An Open Source Infrastructure for Scalable, Robust, Reproducible, and Automated, End-to-End Flow Cytometry Data Analysis
Source: PLoS Comput Biol. 2014 Aug 28;10(8):e1003806. doi: 10.1371/journal.pcbi.1003806 (PMC4148203; doi:10.1371/journal.pcbi.1003806)
Supplement: Text S1 — Description of the statistical model used to identify cell subsets with antigen-specific changes induced upon vaccination in the HVTN 080 data set. (DOCX) [file pcbi.1003806.s013.docx]

**Supplementary Information for “OpenCyto: An Open Source Infrastructure for Scalable, Robust, Reproducible, and Automated, End-to-End Flow Cytometry Data Analysis”**

**Authors**

Greg Finaka, Jacob Frelingera, Wenxin Jianga, Evan W. Newellb, John Rameya, Mark M. Davisc,d,e, Spyros A. Kalamsf,g, Stephen C. De Rosaa,h, and Raphael Gottardoa,i,1

**Affiliations**

a Vaccine and Infectious Disease Division, Fred Hutchinson Cancer Research Center, Seattle, WA 98109, USA

b Agency for Science Technology and Research, Singapore Immunology Network, Singapore 138648.

c Department of Microbiology and Immunology, Stanford University, Stanford, CA 94305, USA

d Institute for Immunity, Transplantation and Infection, Stanford University, Stanford, CA 94305, USA

e The Howard Hughes Medical Institute, Stanford University, Stanford, CA 94305, USA

f Infectious Diseases Division, Department of Medicine, Vanderbilt University School of Medicine, Nashville, TN **37232-2582**

g Department of Pathology, Microbiology, and Immunology, Vanderbilt University School of Medicine, Nashville, TN **37232-2582**

h Department of Laboratory Medicine, University of Washington, Seattle, WA 98195, USA

i Department of Statistics, University of Washington, Seattle, WA 98195, USA

1 To whom correspondence should be addressed

**Supporting Text S1**

*Model Description*

In order to identify cell subsets that exhibit antigen-specific changes upon vaccination, we fit a linear mixed effects model to the background subtracted proportions of cytokine positive cells within each population and gating method. Without loss of generality, for a fixed cell subset and stimulation condition, we let

be the proportions of cytokine positive cells in the antigen stimulated () and non-stimulated () sample from subject, visit , and vaccine regimen , and be the background subtracted proportion of cytokine positive cells. We model:

,

where is the intercept for the cell subset, is a subject-level random effect with , is the effect of visit , is the effect of vaccine regimen , and is the interaction between visit and vaccine regimen , and . We want to test whether (i.e., whether there is an increase in the proportion of cytokine positive cells at the post-vaccine time-point compared to the pre-vaccine time-point) for each vaccine regimen. We fit the model with the R’s *lmer* function from the *lme4* package, and perform linear hypothesis tests using the *glht* and *contrasts* packages.
